# Supplementary material for: Habitual Fructose Intake Relates to Insulin Sensitivity and Fatty Liver Index in Recent-Onset Type 2 Diabetes Patients and Individuals without Diabetes
Source: PubMed Central journal article supplement (PMC6024554; doi:10.3390/nu10060774), 2018-06-15

# **Supplementary material: Habitual Fructose Intake Relates to Insulin Sensitivity and Fatty Liver Index in Recent-Onset Type 2 Diabetes Patients and Individuals without Diabetes**

**Figure S1.** Flow diagram showing the number of participants included in the analyses from those enrolled in the German Diabetes Study.

CON, individuals without diabetes. T2D, individuals with type 2 diabetes.

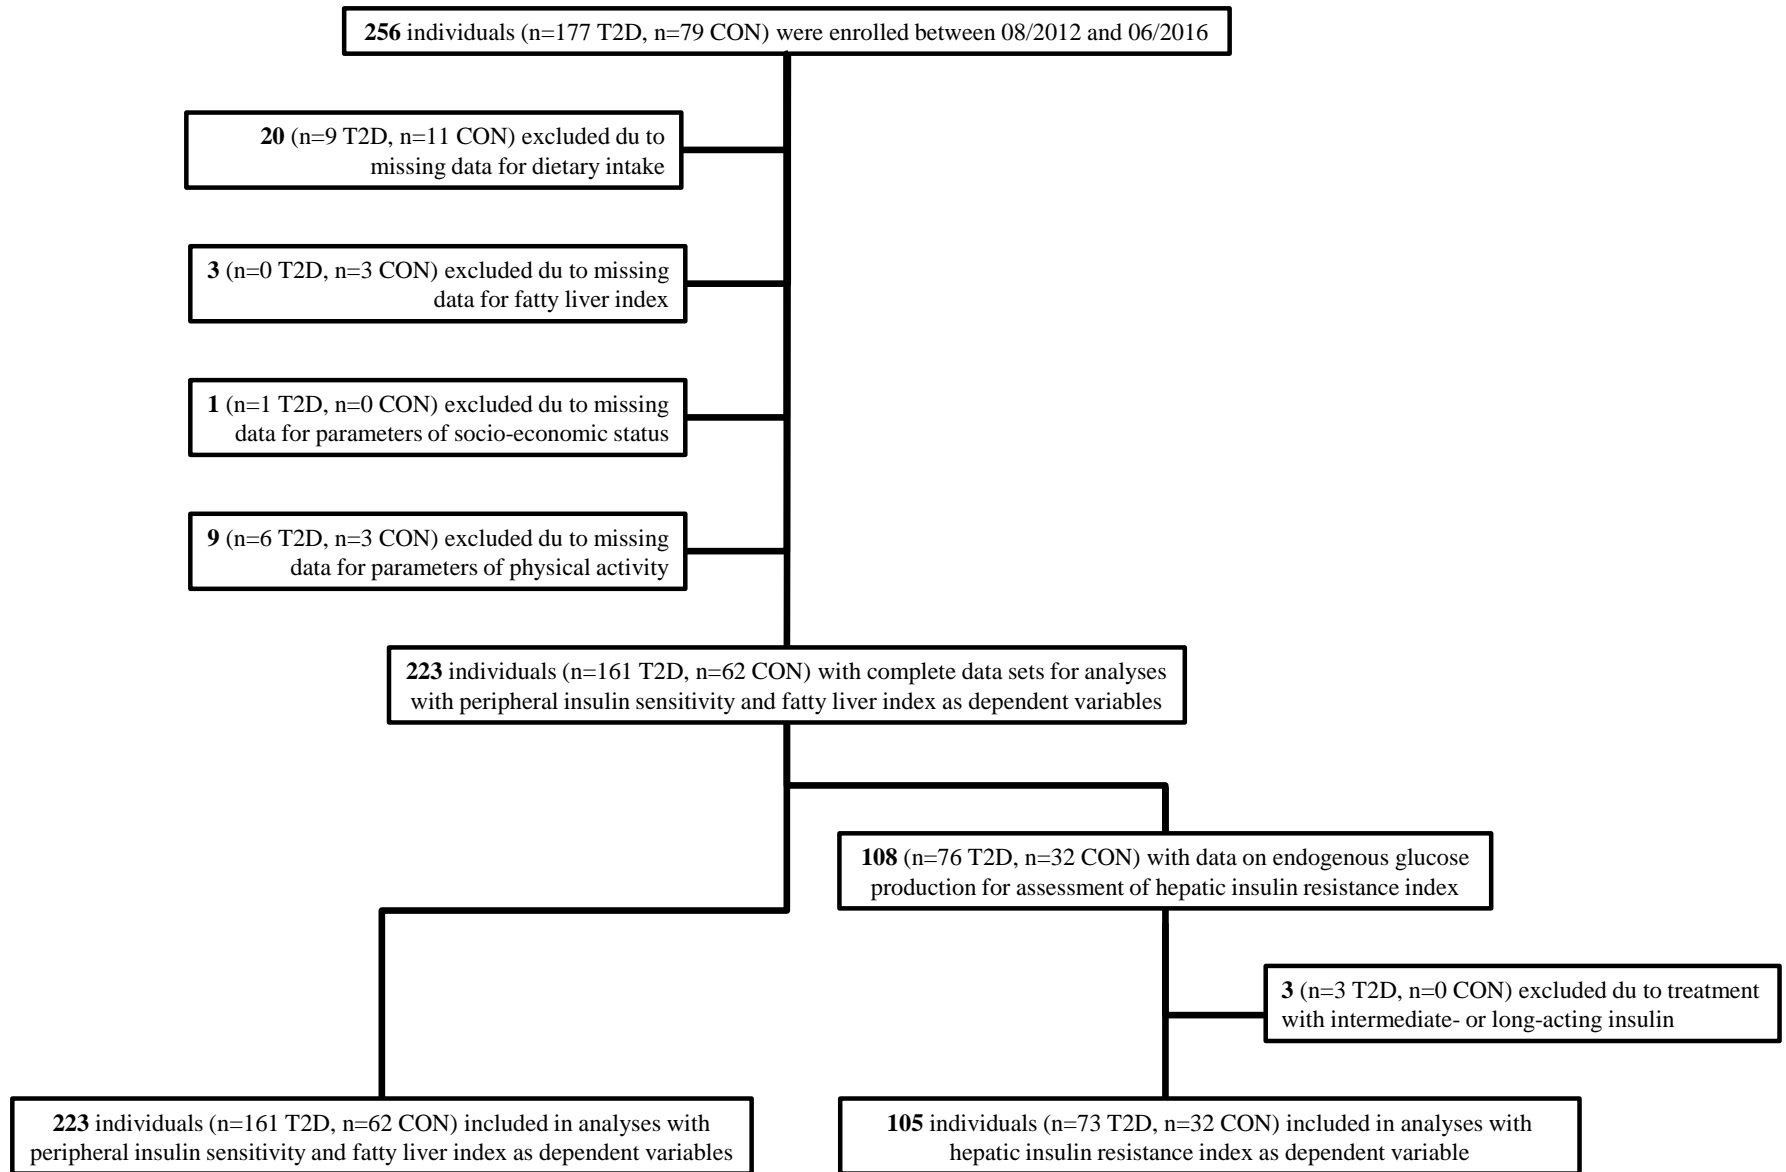

Supplement: nutrients-10-00774-s001.pdf [file nutrients-10-00774-s001.pdf]
